# Supplementary material
Source: Springer Nature journal article supplement (https://www.springermedizin.de/resource/supplementary/12916_2011_521_MOESM3_ESM.pdf/9598092)
Supplement: MOESM3 [file 9598092]

20773 attended

19864 eligible

Excluded 909 subjects due to age less than 20 years old (2), insufficient data for analysis (902), or medication of both PPI and H<sub>2</sub>RA (5).

371 who use PPI for digestive drug.

539 who use H<sub>2</sub>RA for digestive drug.

18954 who use neither PPI nor H<sub>2</sub>RA.
